# Supplementary material for: Degradation of bisphenol A during heat-activated peroxodisulfate treatment: kinetics, mechanism, and transformation products
Source: Royal Society of Chemistry journal article supplement (doi:10.1039/d5ra04707b), 2025-01-01
Supplement: d5ra04707b1.pdf [file d5ra04707b1.pdf]

## **Supplementary Information**

### **Degradation of bisphenol A during heat-activated peroxodisulfate treatment: Kinetics, mechanism, and transformation products**

Chunyu Wang<sup>a</sup>, Juan Yan<sup>a</sup>, Jia Yuan<sup>a</sup>, Ling Zhang<sup>a</sup>, Wei Qian<sup>b</sup>, Guochen Bian<sup>b</sup>, Yunhong Song<sup>a</sup>, Xu Gao<sup>a,\*</sup>, Han Mao<sup>c,\*\*</sup>

<sup>a</sup> Chaohu Regional Collaborative Technology Service Center for Rural Revitalization of Anhui Province, School of Biological and Environmental Engineering, Chaohu University, Hefei, 238000, China

<sup>b</sup> Anhui Green Energy Technology Institute Co., Hefei, 238088, China

<sup>c</sup> South China Institute of Environment Sciences, Ministry of Ecology and Environment, Guangdong, 510655, China

\*Corresponding author: E-mail: [gaoxun@chu.edu.cn](mailto:gaoxun@chu.edu.cn)

\*\*Co-Corresponding author: E-mail: [maohan@scies.org](mailto:maohan@scies.org)

Telephone: +86-0551-82369184

**3 Texts, 1 Tables, 5 Figures**

### **Text S1. Chemicals.**

Bisphenol A (BPA,  $\geq 98.5\%$ ), sodium peroxydisulfate ( $\text{Na}_2\text{S}_2\text{O}_8$ ,  $\geq 99.0\%$ ), sodium hydroxide ( $\text{NaOH}$ ,  $\geq 98.5\%$ ), and sodium sulfite ( $\text{Na}_2\text{SO}_3$ ,  $\geq 99.0\%$ ) were purchased from Aladdin Chemistry Co. Ltd. (Shanghai, China). Sodium bicarbonate ( $\text{NaHCO}_3$ ,  $\geq 99.0\%$ ), sodium nitrate ( $\text{NaNO}_3$ ,  $\geq 98.0\%$ ), potassium dihydrogen phosphate ( $\text{KH}_2\text{PO}_4$ ,  $\geq 98.5\%$ ), and sodium chloride ( $\text{NaCl}$ ,  $\geq 99.5\%$ ) were obtained from Macklin Biochemical Co., Ltd. (Shanghai, China). Methanol (MeOH), tert-butanol (TBA), isopropanol (IPA), and formic acid were of chromatographic grade and obtained from Sigma-Aldrich (St. Louis, MO, USA). Suwannee river NOM (#1R101F) from was supplied by the International Humic Substance Society (Minnesota, USA). All experimental solutions were prepared by ultra-pure water ( $18.25 \text{ M}\Omega/\text{cm}$ ). Balanced Reverse Polymer (BRP) cartridges ( $60 \text{ mg}/3 \text{ cm}^3$ , #00522-20009) were obtained from Welch Materials. Inc.

### **Text S2. SPE procedures.**

Immediately after incubation, the reaction solutions of BPA were adjusted to  $\text{pH} < 2$  by 98% sulfuric acid before SPE. BRP cartridges were conditioned with 5 mL MeOH and 5 mL water ( $\text{pH} 3$ ) sequentially, followed by sample loading. Approximately 50 mL sample was loaded onto each cartridge, then rinsed with 2 mL water and 2 mL 3% MeOH-water and blown to dryness under vacuum. The cartridge was then eluted with 2 mL MeOH.

### **Text S3. Instrumental setup of HRMS.**

Transformation products of BPA in the samples were identified by a Thermo Fisher Scientific Q-Exactive HRMS (Waltham, MA, USA) equipped with an ZORBAX SB-C18 column (Agilent,  $5 \mu\text{m}$ ,  $2.1 \times 100 \text{ mm}$ ). Elution was performed at a flow rate of  $0.2 \text{ mL min}^{-1}$  with  $\text{H}_2\text{O} + 0.1\%$  formic acid (v/v) (eluent A) and  $\text{MeOH} + 0.1\%$  formic acid (v/v) (eluent B), employing a linear gradient as follows: 95% A, 0-3 min; 95% to 5% A, 3-7 min; 5% A, 7-12 min; 5% to 95% A, 12-12.1 min; 95% A, 12.1-15 min. The sample injection volume was  $2 \mu\text{L}$ . Mass analyses were conducted in negative mode using electrospray ionization (ESI) source. The instrument parameters used for sample analysis were as follows: ion transfer tube temperature of  $350^\circ\text{C}$ ; source temperature of  $300^\circ\text{C}$ ; sheath gas pressure of 35 arb, auxiliary gas pressure of 10 arb, spray voltage of 3500 V. Mass spectrometric data was collected at full scan mode over a mass range of  $m/z$  60-900 to identify the transformation products.

**Table S1.** Mass spectrum data and proposed molecular structures for the transformation products generated from BPA in heat/PDS system.

| Transformation Products | Retention time | Measured exact mass             | Formula of derived molecule                    | Proposed structure                                                                    |
|-------------------------|----------------|---------------------------------|------------------------------------------------|---------------------------------------------------------------------------------------|
| BPA                     | 3.06           | 227.12741<br>[M-H] <sup>-</sup> | C <sub>15</sub> H <sub>16</sub> O <sub>2</sub> | 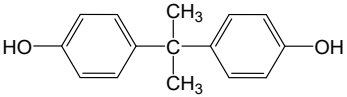    |
| P1                      | 4.46           | 243.11685<br>[M-H] <sup>-</sup> | C <sub>15</sub> H <sub>16</sub> O <sub>3</sub> |     |
| P2                      | 2.45           | 258.91504<br>[M-H] <sup>-</sup> | C <sub>15</sub> H <sub>16</sub> O <sub>4</sub> |     |
| P3                      | 1.46           | 277.09781<br>[M+H] <sup>+</sup> | C <sub>15</sub> H <sub>16</sub> O <sub>5</sub> |   |
| P4                      | 0.83           | 290.90201<br>[M-H] <sup>-</sup> | C <sub>15</sub> H <sub>16</sub> O <sub>6</sub> |   |
| P5                      | 7.16           | 213.01425<br>[M-H] <sup>-</sup> | C <sub>14</sub> H <sub>14</sub> O <sub>2</sub> |   |
| P6                      | 0.64           | 199.90761<br>[M-H] <sup>-</sup> | C <sub>13</sub> H <sub>12</sub> O <sub>2</sub> |   |
| P7                      | 1.89           | 109.02868<br>[M+H] <sup>+</sup> | C <sub>7</sub> H <sub>8</sub> O                |  |

|     |       |                                 |                                                |                                                                                                                                                                                      |
|-----|-------|---------------------------------|------------------------------------------------|--------------------------------------------------------------------------------------------------------------------------------------------------------------------------------------|
| P8  | 7.514 | 135.04716<br>[M-H] <sup>-</sup> | C <sub>9</sub> H <sub>12</sub> O               | 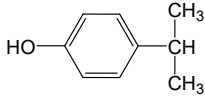                                                                                                  |
| P9  | 6.95  | 153.09103<br>[M-H] <sup>-</sup> | C <sub>9</sub> H <sub>12</sub> O <sub>2</sub>  |                                                                                                    |
| P10 | 2.29  | 149.02335<br>[M-H] <sup>-</sup> | C <sub>9</sub> H <sub>10</sub> O <sub>2</sub>  |                                                                                                    |
| P11 | 3.04  | 137.02303<br>[M-H] <sup>-</sup> | C <sub>7</sub> H <sub>6</sub> O <sub>3</sub>   |                                                                                                 |
| P12 | 6.17  | 95.06091<br>[M+H] <sup>+</sup>  | C <sub>6</sub> H <sub>6</sub> O                |                                                                                                 |
| P13 | 6.85  | 111.05555<br>[M+H] <sup>+</sup> | C <sub>6</sub> H <sub>6</sub> O <sub>2</sub>   | <br>Or<br> |
| P14 | 8.00  | 439.30029<br>[M+H] <sup>+</sup> | C <sub>30</sub> H <sub>30</sub> O <sub>3</sub> |                                                                                                  |

|     |      |                                 |                                                |                                                                                    |
|-----|------|---------------------------------|------------------------------------------------|------------------------------------------------------------------------------------|
| P15 | 7.66 | 455.27890<br>[M+H] <sup>+</sup> | C <sub>30</sub> H <sub>30</sub> O <sub>4</sub> | 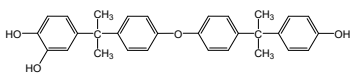 |
|-----|------|---------------------------------|------------------------------------------------|------------------------------------------------------------------------------------|

---

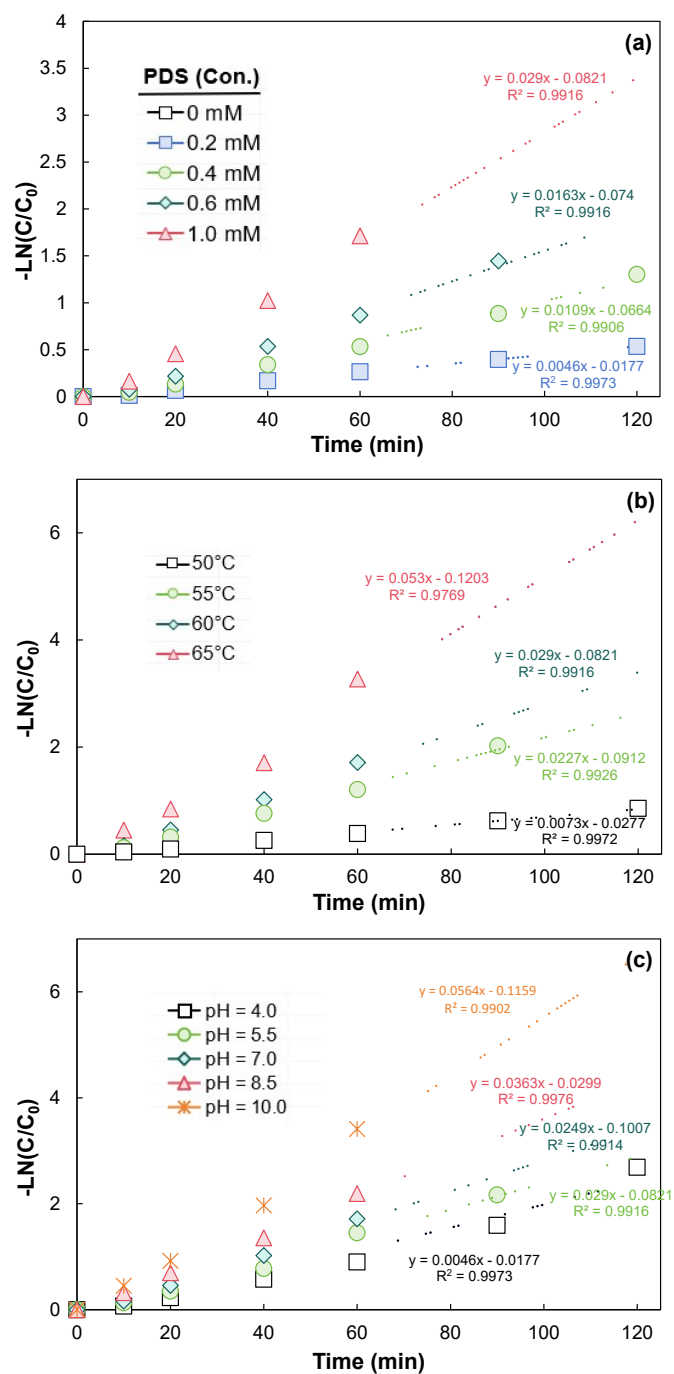

**Fig. S1.** Effects of (a) initial PDS dosage at 60°C, (b) reaction temperature, (c) solution pH on the observed pseudo-first-order rate constant ( $k_{\text{obs}}$ ) of BPA degradation in heat/PDS system. Experimental conditions:  $[\text{BPA}]_0 = 40 \mu\text{M}$ ,  $[\text{PDS}]_0 = 1.0 \text{ mM}$ , pH  $7.0 \pm 0.1$  maintained by 10.0 mM phosphate buffer.

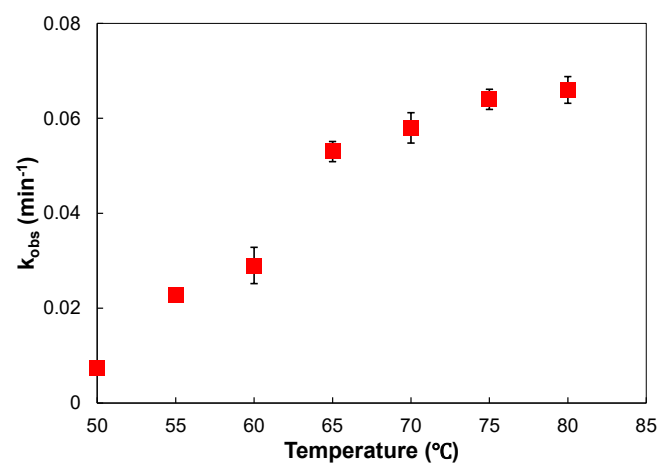

**Fig. S2.** Relationship between the  $k_{\text{obs}}$  of BPA degradation and reaction temperature. Experimental conditions:  $[\text{BPA}]_0 = 40 \mu\text{M}$ ,  $[\text{PDS}]_0 = 1.0 \text{ mM}$ ,  $\text{pH } 7.0 \pm 0.1$  maintained by 10.0 mM phosphate buffer.

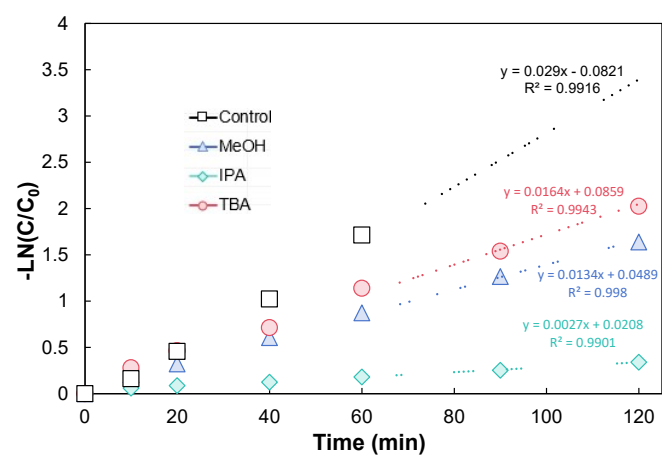

**Fig. S3.** Effects of MeOH, TBA, and IPA on the  $k_{\text{obs}}$  of BPA degradation in heat/PDS system. Experimental conditions:  $[\text{BPA}]_0 = 40 \mu\text{M}$ ,  $[\text{PDS}]_0 = 1.0 \text{ mM}$ ,  $[\text{MeOH}]_0 = 10 \text{ mM}$ ,  $[\text{TBA}]_0 = 10 \text{ mM}$ ,  $[\text{IPA}]_0 = 10 \text{ mM}$ ,  $\text{pH } 7.0 \pm 0.1$  maintained by  $10.0 \text{ mM}$  phosphate buffer.



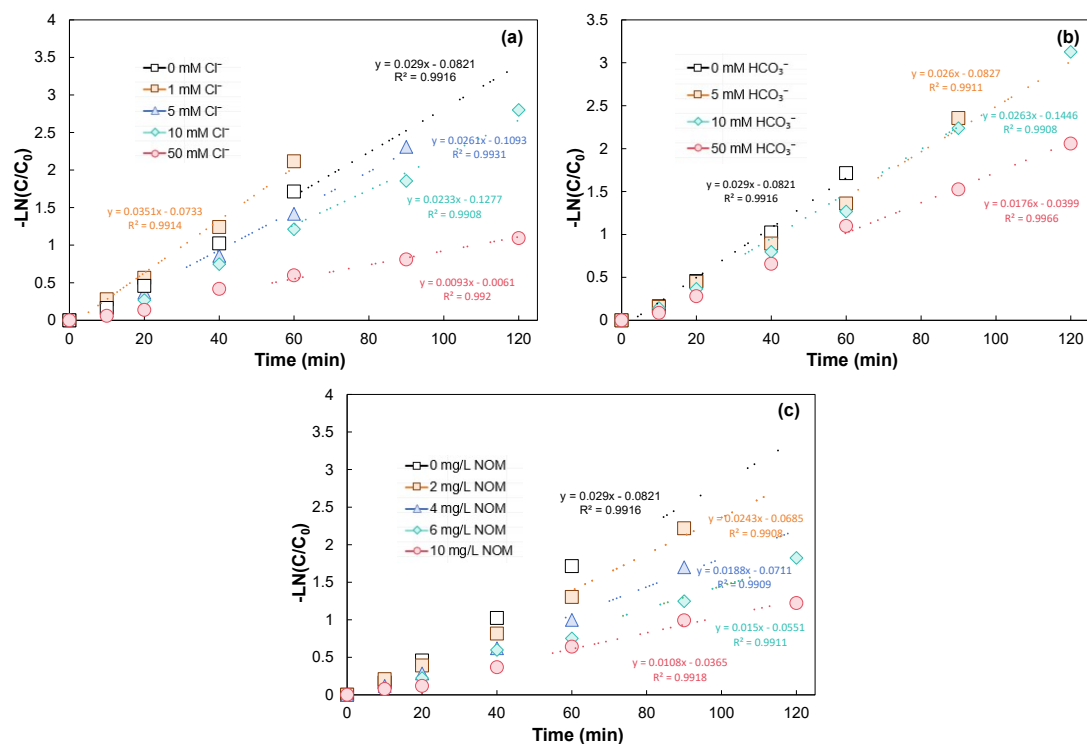

**Fig. S4.** Effects of (a)  $\text{Cl}^-$ , (b)  $\text{HCO}_3^-$ , and (c) NOM on the  $k_{\text{obs}}$  of BPA degradation in heat/PDS system. Experimental conditions:  $[\text{BPA}]_0 = 40 \mu\text{M}$ ,  $[\text{PDS}]_0 = 1.0 \text{ mM}$ ,  $[\text{Cl}^-]_0 = 0\text{-}50 \text{ mM}$ ,  $[\text{HCO}_3^-]_0 = 0\text{-}50 \text{ mM}$ ,  $[\text{NOM}]_0 = 0\text{-}10 \text{ mg/L}$ , pH  $7.0 \pm 0.1$  maintained by  $10.0 \text{ mM}$  phosphate buffer.

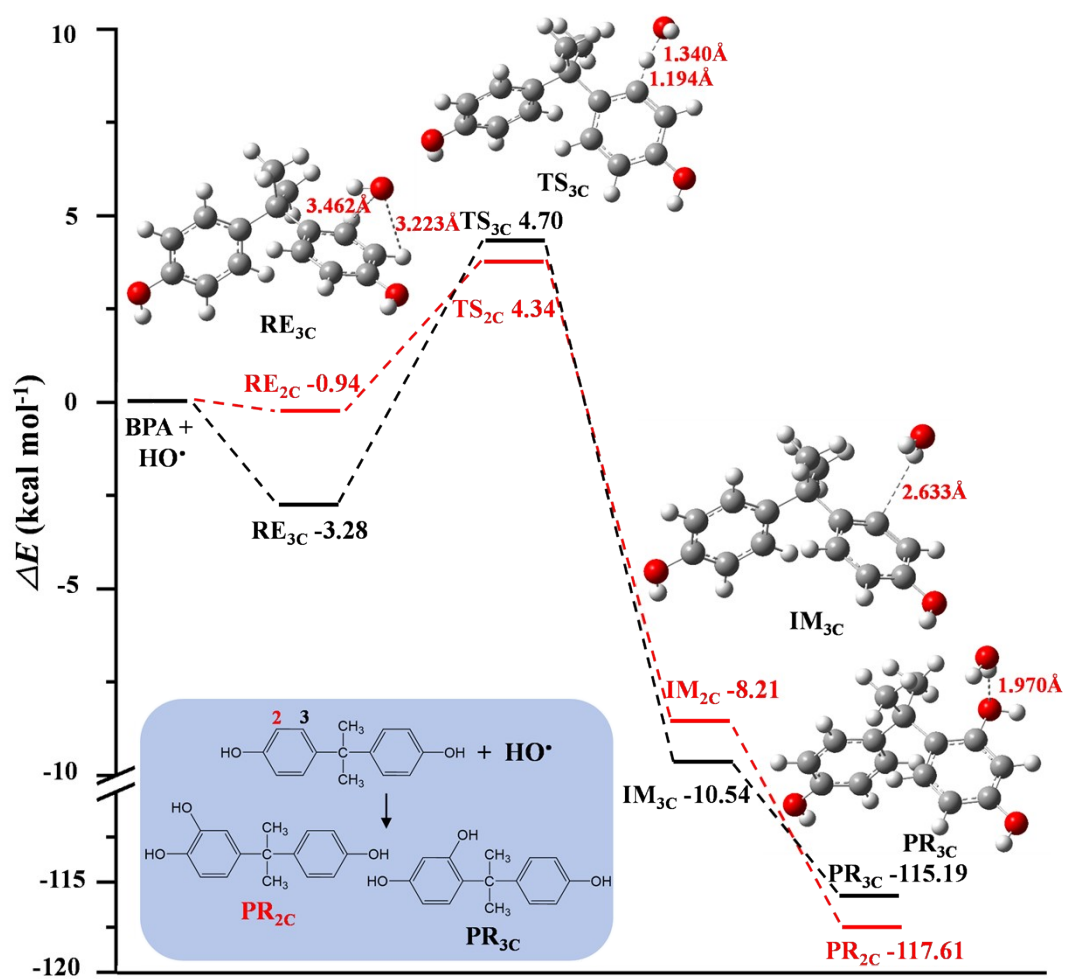

**Fig. S5.** Calculation of the  $\Delta E$  value for  $\text{HO}^\bullet$  addition reactions at different C sites of BPA molecule.
